# Supplementary material for: Effectiveness of a Mobile eHealth App in Guiding Patients in Pain Control and Opiate Use After Total Knee Replacement: Randomized Controlled Trial
Source: PubMed Central journal article supplement (PMC7101497; doi:10.2196/16415), 2020-03-13

## Appendix 2 – Content and use of the PainCoach app

**Table 1.** Short schematic overview PainCoach app content.

| Post-operative days | Inputted pain level | Pain medication advice                                                                                                                                                                                                                                                                                                                    | Other advice                                                                                                                                                      |
|---------------------|---------------------|-------------------------------------------------------------------------------------------------------------------------------------------------------------------------------------------------------------------------------------------------------------------------------------------------------------------------------------------|-------------------------------------------------------------------------------------------------------------------------------------------------------------------|
| 1-2                 | No pain             | Acetaminophen (Paracetamol):<br>2 tablets, 4 times per day.<br>Dosage 500 mg.<br>NSAID (Diclofenac) <sup>a</sup> : 1 tablet,<br>3 times per day. Dosage: 50 mg.                                                                                                                                                                           | Execute exercises.<br>Rest between exercises:<br>immobilising the operated leg.                                                                                   |
|                     | Bearable pain       | Acetaminophen (Paracetamol):<br>2 tablets, 4 times per day.<br>Dosage 500 mg.<br>NSAID (Diclofenac) <sup>a</sup> : 1 tablet,<br>3 times per day. Dosage: 50 mg.                                                                                                                                                                           | Execute exercises.<br>Use ice and heat packs.<br>Rest between exercises:<br>immobilising the operated leg.                                                        |
|                     | Unbearable pain     | Acetaminophen (Paracetamol):<br>2 tablets, 4 times per day.<br>Dosage 500 mg.<br>NSAID (Diclofenac) <sup>a</sup> : 1 tablet,<br>3 times per day. Dosage: 50 mg.<br>Opiate (Oxynorm / oxycodon):<br>Maximum of 1 tablet, 3 times<br>per day. Dosage: 5 mg.                                                                                 | Execute exercises without forcing.<br>Contact physiotherapist for advice.<br>Use ice and heat packs.<br>Rest between exercises:<br>immobilising the operated leg. |
|                     | Untenable pain      | Call the clinic.                                                                                                                                                                                                                                                                                                                          | Execute exercises without forcing.<br>Contact physiotherapist for advice.<br>Use ice and heat packs.<br>Rest between exercises:<br>immobilising the operated leg. |
| 3-7                 | No pain             | Acetaminophen (Paracetamol):<br>2 tablets, 4 times per day.<br>Dosage 500 mg.                                                                                                                                                                                                                                                             | Execute exercises.<br>Rest between exercises:<br>immobilising the operated leg.                                                                                   |
|                     | Bearable pain       | Acetaminophen (Paracetamol):<br>2 tablets, 4 times per day.<br>Dosage 500 mg.<br>NSAID (Diclofenac) <sup>a</sup> : 1 tablet,<br>3 times per day. Dosage: 50 mg.                                                                                                                                                                           | Execute exercises.<br>Use ice and heat packs.<br>Rest between exercises:<br>immobilising the operated leg.                                                        |
|                     | Unbearable pain     | Acetaminophen (Paracetamol):<br>2 tablets, 4 times per day.<br>Dosage 500 mg.<br>NSAID (Diclofenac) <sup>a</sup> : 1 tablet,<br>3 times per day. Dosage: 50 mg.<br>Opiate (Oxynorm / oxycodon):<br>Maximum of 1 tablet, 3 times<br>per day. Dosage: 5 mg.<br>Call the clinic for gabapentin at<br>indication on doctor's<br>prescription. | Execute exercises without forcing.<br>Contact physiotherapist for advice.<br>Use ice and heat packs.<br>Rest between exercises:<br>immobilising the operated leg. |

|      |                 |                                                                                                                                                                                                                                                                                                                                           |                                                                                                                                                                   |
|------|-----------------|-------------------------------------------------------------------------------------------------------------------------------------------------------------------------------------------------------------------------------------------------------------------------------------------------------------------------------------------|-------------------------------------------------------------------------------------------------------------------------------------------------------------------|
|      | Untenable pain  | Call the clinic.                                                                                                                                                                                                                                                                                                                          | Execute exercises without forcing.<br>Contact physiotherapist for advice.<br>Use ice and heat packs.<br>Rest between exercises:<br>immobilising the operated leg. |
| 8-14 | No pain         | Acetaminophen (Paracetamol):<br>2 tablets, 4 times per day.<br>Dosage 500 mg.                                                                                                                                                                                                                                                             | Execute exercises.<br>Rest between exercises:<br>immobilising the operated leg.                                                                                   |
|      | Bearable pain   | Acetaminophen (Paracetamol):<br>2 tablets, 4 times per day.<br>Dosage 500 mg.                                                                                                                                                                                                                                                             | Execute exercises.<br>Use ice and heat packs.<br>Rest between exercises:<br>immobilising the operated leg.                                                        |
|      | Unbearable pain | Acetaminophen (Paracetamol):<br>2 tablets, 4 times per day.<br>Dosage 500 mg.<br>NSAID (Diclofenac) <sup>a</sup> : 1 tablet,<br>3 times per day. Dosage: 50 mg.<br>Opiate (Oxynorm / oxycodon):<br>Maximum of 1 tablet, 3 times<br>per day. Dosage: 5 mg.<br>Call the clinic for gabapentin at<br>indication on doctor's<br>prescription. | Execute exercises without forcing.<br>Contact physiotherapist for advice.<br>Use ice and heat packs.<br>Rest between exercises:<br>immobilising the operated leg. |
|      | Untenable pain  | Call the clinic.                                                                                                                                                                                                                                                                                                                          | Execute exercises without forcing.<br>Contact physiotherapist for advice.<br>Use ice and heat packs.<br>Rest between exercises:<br>immobilising the operated leg. |

<sup>a</sup>NSAID: non-steroidal anti-inflammatory drug.

**Figure 1.** Screenshots of PainCoach app showing how the PainCoach app works and how the content was presented to the patients.

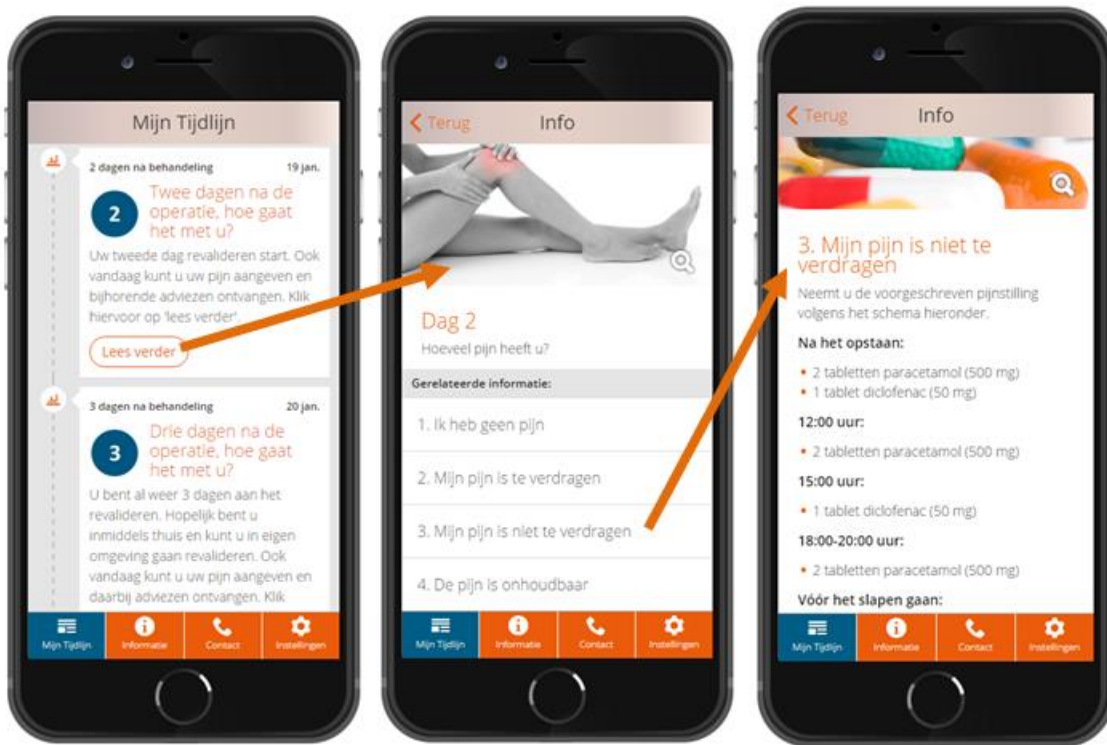

**Figure 2.** Patients with at least one entry in the PainCoach app per day at home.

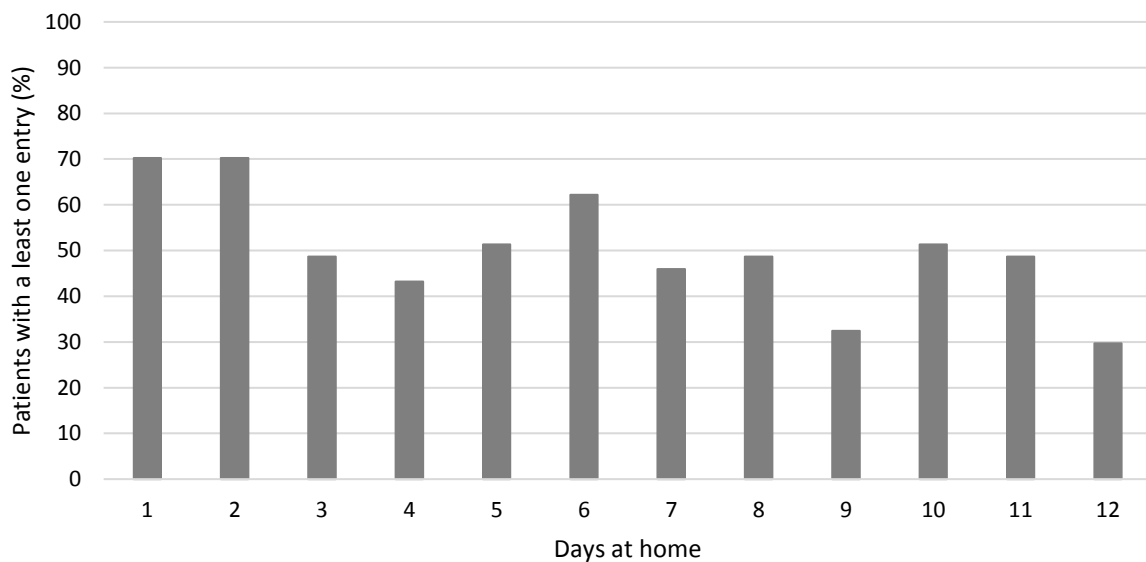

**Figure 3.** Total days at home patients entered the PainCoach app.

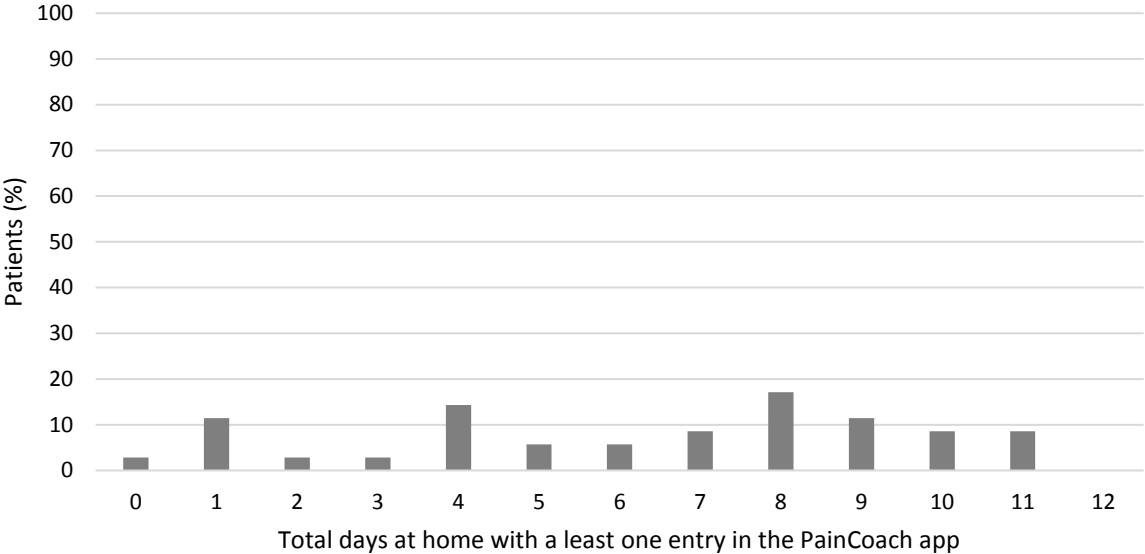

Supplement: mhealth_v8i3e16415_app2.pdf [file mhealth_v8i3e16415_app2.pdf]
