# Supplementary material for: Effectiveness of a Mobile eHealth App in Guiding Patients in Pain Control and Opiate Use After Total Knee Replacement: Randomized Controlled Trial
Source: PubMed Central journal article supplement (PMC7101497; doi:10.2196/16415), 2020-03-13
Supplement: mhealth_v8i3e16415_app1.pdf [file mhealth_v8i3e16415_app1.pdf]

## Appendix 1 – Pain Management Protocol

**Table 1.** Pain Management Protocol

|                                                                     | <b>Medication</b>               | <b>Intake</b>                                                                                                                                                                                                                                                                                                                                                                                                                                                                                                                                                                     | <b>Dosage</b>    |
|---------------------------------------------------------------------|---------------------------------|-----------------------------------------------------------------------------------------------------------------------------------------------------------------------------------------------------------------------------------------------------------------------------------------------------------------------------------------------------------------------------------------------------------------------------------------------------------------------------------------------------------------------------------------------------------------------------------|------------------|
| <b>Pre-operative</b>                                                | Gabapentin                      | 2 hours before surgery 2 tablets                                                                                                                                                                                                                                                                                                                                                                                                                                                                                                                                                  | 600 mg           |
|                                                                     | Acetaminophen (Paracetamol)     | 2 hours before surgery 2 tablets                                                                                                                                                                                                                                                                                                                                                                                                                                                                                                                                                  | 1000 mg          |
|                                                                     | NSAID <sup>a</sup> (Diclofenac) | 2 hours before surgery 1 tablet                                                                                                                                                                                                                                                                                                                                                                                                                                                                                                                                                   | 50 mg            |
| <b>Per-operative</b>                                                | LIA <sup>b</sup>                | <i>Ropivacaine 2 mg/ml and Adrenalin 1 mg/ml at a total volume of 100 ml</i><br>LIA 1: injection of 2 x 20 ml Ropivacaine 2 mg/ml with Adrenalin in the posterior joint capsule and both collateral ligaments before the prosthesis was placed.<br>LIA 2: After placement of the prosthesis, 2 x 20 ml Ropivacaine 2 mg/ml with Adrenalin injections along the edges of the tibia, in the capsule and in fat and soft tissue around the joint were injected.<br>LIA 3: Inject 20 ml Ropivacaine 2 mg/ml without Adrenalin in subcutaneously layers before the wound was stitched. |                  |
| <b>Post-operative during admission</b>                              | Acetaminophen (Paracetamol)     | 2 tablets, 4 times per day                                                                                                                                                                                                                                                                                                                                                                                                                                                                                                                                                        | 500 mg           |
|                                                                     | NSAID <sup>a</sup> (Diclofenac) | 1 tablet, 3 times per day                                                                                                                                                                                                                                                                                                                                                                                                                                                                                                                                                         | 50 mg            |
|                                                                     | Gabapentin                      | Day of surgery 10.00 pm<br>Day after surgery 08.00 am<br>Thereafter at indication                                                                                                                                                                                                                                                                                                                                                                                                                                                                                                 | 300 mg<br>300 mg |
|                                                                     |                                 | <b><i>If necessary (NRS &gt; 4)</i></b>                                                                                                                                                                                                                                                                                                                                                                                                                                                                                                                                           |                  |
|                                                                     | Opiate (Oxynorm / oxycodon)     | Maximum of 1 tablet, 3 times per day                                                                                                                                                                                                                                                                                                                                                                                                                                                                                                                                              | 5 mg             |
| <b>Post-operative at home - Usually 1 or 2 nights after surgery</b> | Acetaminophen (Paracetamol)     | 2 tablets, 4 times per day (until day 14 after surgery)                                                                                                                                                                                                                                                                                                                                                                                                                                                                                                                           | 500 mg           |
|                                                                     |                                 | <b><i>In presence of pain</i></b>                                                                                                                                                                                                                                                                                                                                                                                                                                                                                                                                                 |                  |
|                                                                     | NSAID <sup>a</sup> (Diclofenac) | 1 tablet, 3 times per day (until day 7 after surgery)                                                                                                                                                                                                                                                                                                                                                                                                                                                                                                                             | 50 mg            |
|                                                                     | Opiate (Oxynorm / oxycodon)     | Maximum of 1 tablet, 3 times per day                                                                                                                                                                                                                                                                                                                                                                                                                                                                                                                                              | 5 mg             |
|                                                                     | Gabapentin                      | At indication on doctor's prescription                                                                                                                                                                                                                                                                                                                                                                                                                                                                                                                                            |                  |

<sup>a</sup>NSAID: non-steroidal anti-inflammatory drug.

<sup>b</sup>LIA: local infiltration anesthesia.
